# Supplementary material for: Synthesis and Magnetic Properties of Stable Radical Derivatives Carrying a Phenylacetylene Unit
Source: MDPI journal article supplement (doi:10.3390/molecules23020371), 2018-02-09
Supplement: s1 [file s1]

# Supporting Information

## Synthesis and Magnetic Properties of Stable Radical Derivatives Carrying a Phenylacetylene Unit

Shogo Miyashiro, Tomoaki Ishii, Youhei Miura, and

Naoki Yoshioka\*

*Department of Applied Chemistry, Faculty of Science and Technology, Keio  
University, Yokohama 223-8522, Japan*

E-mail: yoshioka@applc.keio.ac.jp

### Table of contents

|                                              |    |
|----------------------------------------------|----|
| Synthetic procedure .....                    | S2 |
| EPR spectra .....                            | S7 |
| Crystallographic parameter .....             | S8 |
| Distributions of SOMO and spin density ..... | S9 |

## Synthetic procedure

### *tert*-butyl 2-phenyl-2-chlorocarbonylhydrazinecarboxylate **7**

To a solution of **6** (1.04 g, 5.0 mmol) in toluene, pyridine (400  $\mu$ L, 5.0 mmol, 1.0 eq.) was added at  $-78$   $^{\circ}$ C under  $N_2$ . A solution of triphosgene (740 mg, 2.5 mmol, 0.50 eq.) in toluene was added slowly. The mixture was stirred at room temperature for 16 h, and the solvent was removed under vacuum. The solid was diluted with water and AcOEt, and the organic layer was dried over  $Na_2SO_4$  and evaporated under vacuum. The white residue was purified by column chromatography on silica gel using AcOEt : *n*-hexane = 1 : 4 as the eluent to afford a white solid. Yield: 1.16 g, 86%;  $R_f$  value: 0.3 (AcOEt : *n*-hexane = 1 : 4); mp: 96-98  $^{\circ}$ C;  $^1H$ -NMR ( $CDCl_3$ , 300 MHz)  $\delta$  (ppm): 7.45-7.41 (m, 5H), 1.50 (s, 9H);  $^{13}C$ -NMR ( $CDCl_3$ , 75 MHz)  $\delta$  (ppm): 154.0, 140.9, 129.1, 127.7, 124.1, 123.7, 82.7, 28.0; IR (KBr pellet,  $cm^{-1}$ ): 3275 ( $\nu_{N-H}$ ), 1759 ( $\nu_{C=O}$ ), 1709 ( $\nu_{C=O}$ ).

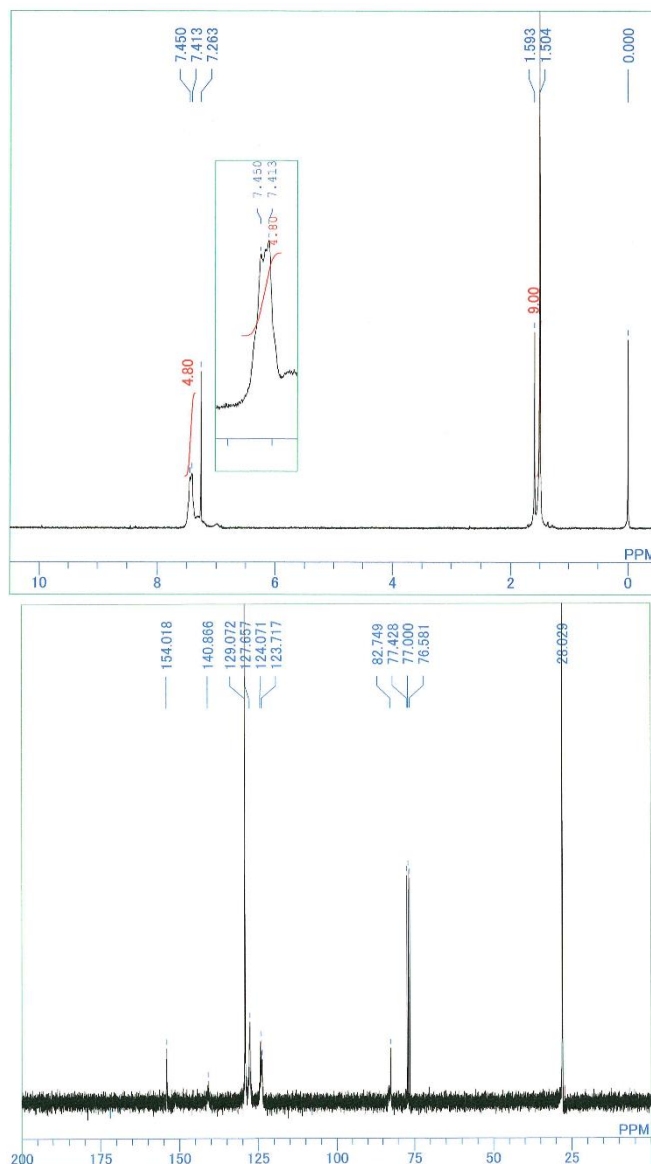

Figure S1.  $^1H$  and  $^{13}C$  NMR spectra of **7**.

di-*tert*-butyl-2, 2'-cabonylbis-(2-phenylhydrazinecarboxylate) **8**

A mixture of **7** (1.16 g, 4.3 mmol) and **6** (1.79 g, 8.6 mmol, 2.0 eq.) was solved in toluene under N<sub>2</sub>. The solution was stirred at 110 °C for 16 h, and water and AcOEt were added to the solution. The organic layer was dried over Na<sub>2</sub>SO<sub>4</sub> and evaporated under vacuum. The residue was purified by column chromatography on silica gel using AcOEt : *n*-hexane = 1 : 2 to afford a white solid. Yield: 1.33 g, 70%; *R*<sub>f</sub> value: 0.5 (AcOEt : *n*-hexane = 1 : 2); mp: 178-179 °C; <sup>1</sup>H-NMR (acetone-d<sub>6</sub>, 300 MHz) δ (ppm): 7.34 (d, *J* = 6.6 Hz, 4H), 7.08 (t, *J* = 6.9 Hz, 4H), 6.92 (t, *J* = 6.6 Hz, 2H), 1.49 (s, 18H); <sup>13</sup>C-NMR (CDCl<sub>3</sub>, 75 MHz) δ (ppm): 157.5, 155.8, 142.6, 128.4, 125.8, 124.4, 81.8, 28.2; LRMS (MALDI-TOF): *m/z* = 441 [M-H]; IR (KBr pellet, cm<sup>-1</sup>): 3327 (ν<sub>N-H</sub>), 1714 (ν<sub>C=O</sub>).

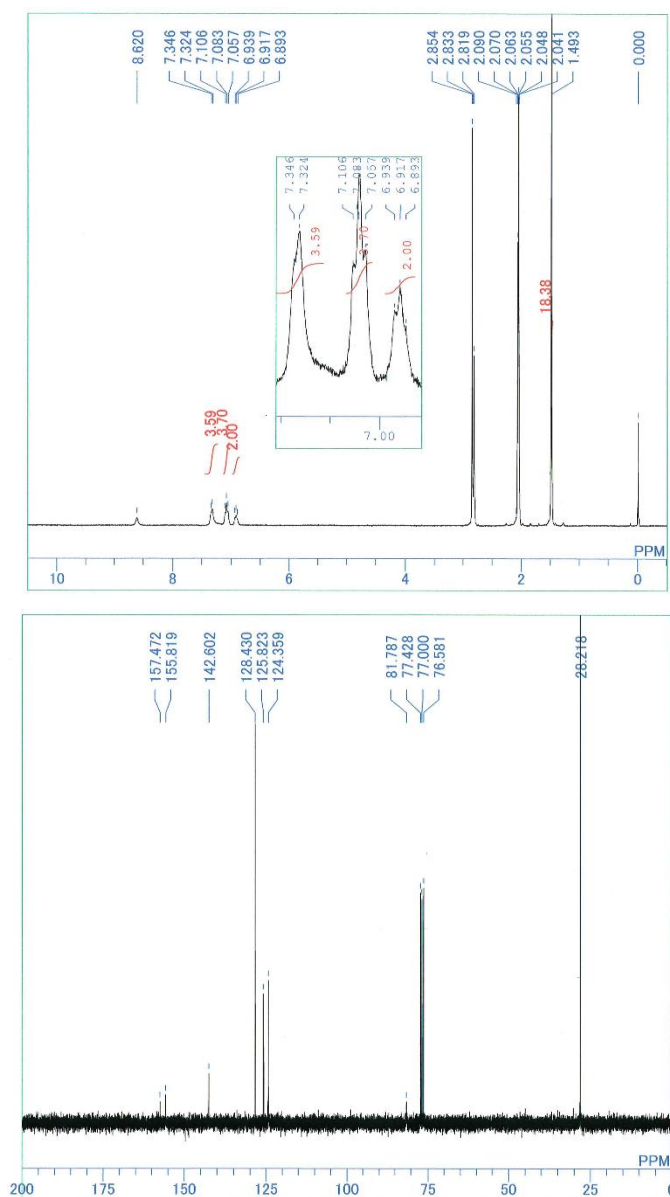

Figure S2. <sup>1</sup>H and <sup>13</sup>C NMR spectra of **8**.

2,4-diphenyl-6-(phenylethynyl)-1,2,4,5-tetrazinan-3-one **11**

To a solution of **8** (1.33 g, 3.0 mmol) in 33 mL of EtOH, 17 mL of 1M HCl was added. The mixture was stirred at 80 °C for 1 h, and then the mixture was stirred at room temperature for 16 h. The solvent was removed under vacuum, and the solid was washed with CHCl<sub>3</sub>, then the white residue (863 mg, 2.7 mmol) was obtained. To a solution of the white residue (123 mg, 0.39 mmol) in EtOH, 3-phenylpropionaldehyde (51 mg, 0.39 mmol, 1.0 eq.) and sodium acetate (64 mg, 0.78 mmol, 2.0 eq.) were added under N<sub>2</sub>. The mixture was stirred for 24 h, and the solvent was removed under vacuum. Water and CH<sub>2</sub>Cl<sub>2</sub> were added to the residue and the organic layer was dried over Na<sub>2</sub>SO<sub>4</sub> and evaporated under vacuum. The yellow residue was purified by column chromatography on silica gel using CH<sub>2</sub>Cl<sub>2</sub> as the eluent to afford a white solid. Yield: 106 mg, 76%; *R<sub>f</sub>* value: 0.1 (CH<sub>2</sub>Cl<sub>2</sub>); mp: 195-198 °C; <sup>1</sup>H-NMR (CDCl<sub>3</sub>, 300 MHz) δ (ppm): 7.68-7.61 (m, 5H), 7.45-7.30 (m, 8H), 7.17-7.12 (m, 2H), 5.35 (t, *J* = 8.7 Hz, 1H), 4.93 (d, *J* = 8.7 Hz, 2H); <sup>13</sup>C-NMR (DMSO, 75 MHz) δ (ppm): 155.0, 143.0, 131.4, 129.1, 128.8, 128.0, 123.8, 122.2, 121.3, 85.4, 83.9, 62.1; LRMS (MALDI-TOF): *m/z* = 355 [M+H]; IR (KBr pellet, cm<sup>-1</sup>): 3249 (ν<sub>N-H</sub>), 1623 (ν<sub>C=O</sub>).

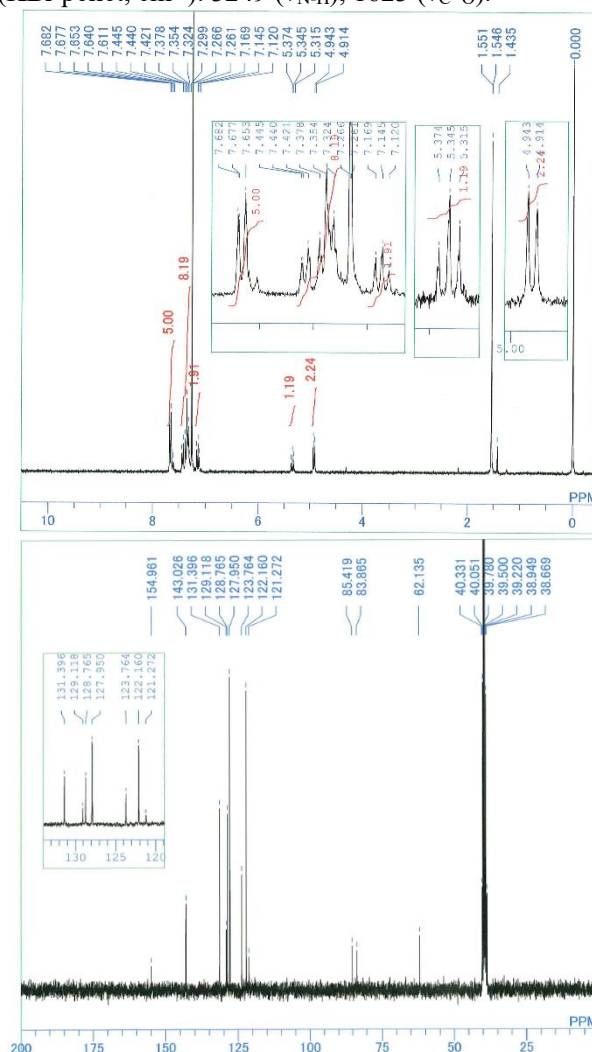

Figure S3. <sup>1</sup>H and <sup>13</sup>C NMR spectra of **11**.

## 1,5-diphenyl-3-phenylethynyl-6-oxo-1,2,4,5-tetrazin-2-yl **2**

To a solution of **11** (106 mg, 0.30 mmol) in toluene, DDQ (102 mg, 0.45 mmol, 1.5 eq.) was added under N<sub>2</sub>. The mixture was stirred for 1 h, and the solvent was removed under vacuum. The solid was diluted with water and AcOEt, and the organic layer was dried over Na<sub>2</sub>SO<sub>4</sub> and evaporated under vacuum. The residue was purified by column chromatography on silica gel using CH<sub>2</sub>Cl<sub>2</sub> : *n*-hexane = 1 : 2 as the eluent to afford a red solid (88 mg, 83%). Yield: 88 mg, 83%; *R*<sub>f</sub> value: 0.5 (CH<sub>2</sub>Cl<sub>2</sub> : *n*-hexane = 1 : 2); mp: 186-188 °C; LRMS (MALDI-TOF): *m/z* = 351 [M]; IR (KBr pellet, cm<sup>-1</sup>): 2227 (ν<sub>C≡C</sub>), 1702 (ν<sub>C=O</sub>); Elem. Anal.: calcd. for C<sub>22</sub>H<sub>15</sub>N<sub>4</sub>O: C, 75.20; H, 4.30; N, 15.94. Found: C, 75.29; H, 4.29; N, 15.59.

## 2,4-diisopropyl-6-(phenylethynyl)-1,2,4,5-tetrazinan-3-one **12**

To a solution of **10** (3.03 g, 8.1 mmol) in 40 mL of EtOH, 20 mL of 1M HCl was added. The mixture was stirred at 80 °C for 30 min, and then the mixture was stirred at room temperature for 16 h. The solvent was removed under vacuum, and the solid was washed with CHCl<sub>3</sub>, then the white residue (1.95 g, 7.9 mmol) was obtained. To a solution of the white residue (235 mg, 0.95 mmol, 1.3 eq.) in 3 mL of EtOH, 3-phenylpropionaldehyde (95 mg, 0.73 mmol) and sodium acetate (156 mg, 1.9 mmol, 2.0 eq.) were added under N<sub>2</sub>. The mixture was stirred for 24 h, and the solvent was removed under vacuum. Water and AcOEt were added to the residue and the organic layer was dried over Na<sub>2</sub>SO<sub>4</sub> and evaporated under vacuum. The yellow residue was purified by column chromatography on silica gel using AcOEt : *n*-hexane = 1 : 1 as the eluent to afford a white solid. Yield: 160 mg, 77%; *R*<sub>f</sub> value: 0.3 (AcOEt : *n*-hexane = 1 : 1); mp: 151.5-153 °C; <sup>1</sup>H-NMR (CDCl<sub>3</sub>, 300 MHz) δ (ppm): 7.46 (d, *J* = 8.1 Hz, 2H), 7.37-7.32 (m, 3H), 4.67-4.58 (m, 3H), 3.97 (d, *J* = 9.9 Hz, 2H), 1.16 (d, *J* = 6.9 Hz, 6H), 1.13 (d, *J* = 6.6 Hz, 6H); <sup>13</sup>C-NMR (DMSO, 75 MHz) δ (ppm): 153.9, 131.8, 129.1, 128.4, 121.4, 85.9, 82.4, 62.2, 47.6, 19.3, 18.7; LRMS (MALDI-TOF): *m/z* = 288 [M+2H]; IR (KBr pellet, cm<sup>-1</sup>): 2243 (ν<sub>C≡C</sub>), 1583 (ν<sub>C=O</sub>).

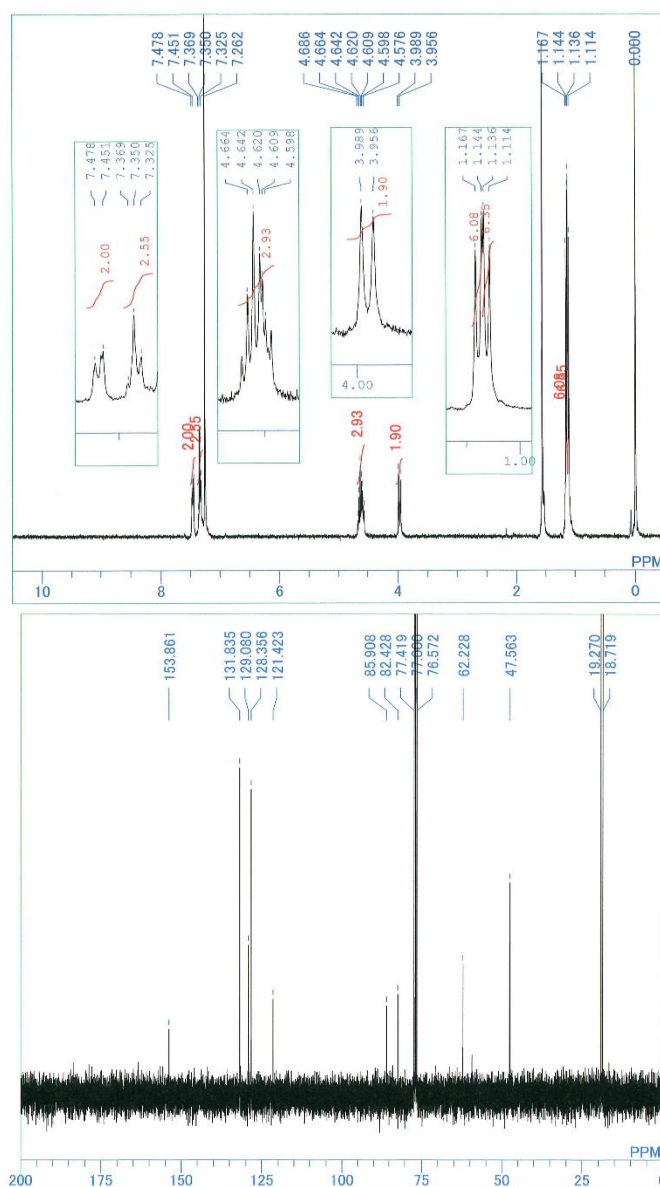

**Figure S4.** <sup>1</sup>H and <sup>13</sup>C NMR spectra of **12**.

**1,5-diisopropyl-3-phenylethynyl-6-oxo-1,2,4,5-tetrazin-2-yl **3****

To a solution of **12** (80 mg, 0.28 mmol) in 3 mL of toluene, DDQ (95 mg, 0.42 mmol, 1.5 eq.) was added under N<sub>2</sub>. The mixture was stirred for 2 h, and the solvent was removed under vacuum. The solid was diluted with water and AcOEt and the organic layer was dried over Na<sub>2</sub>SO<sub>4</sub>. The solvent was evaporated under vacuum and the residue was purified by column chromatography on silica gel using AcOEt : *n*-hexane = 1 : 3 as the eluent to afford a orange solid. Yield: 43 mg, 54%; *R<sub>f</sub>* value: 0.7 (AcOEt : *n*-hexane = 1 : 3); mp: 133-135 °C; LRMS (MALDI-TOF): *m/z* = 285 [M+2H]; IR (KBr pellet, cm<sup>-1</sup>): 2229 (ν<sub>C≡C</sub>), 1680 (ν<sub>C=O</sub>); Elem. Anal.: calcd. for C<sub>16</sub>H<sub>19</sub>N<sub>4</sub>O: C, 67.82; H, 6.76; N, 19.77. Found: C, 67.03; H, 6.81; N, 19.60.

## EPR spectra

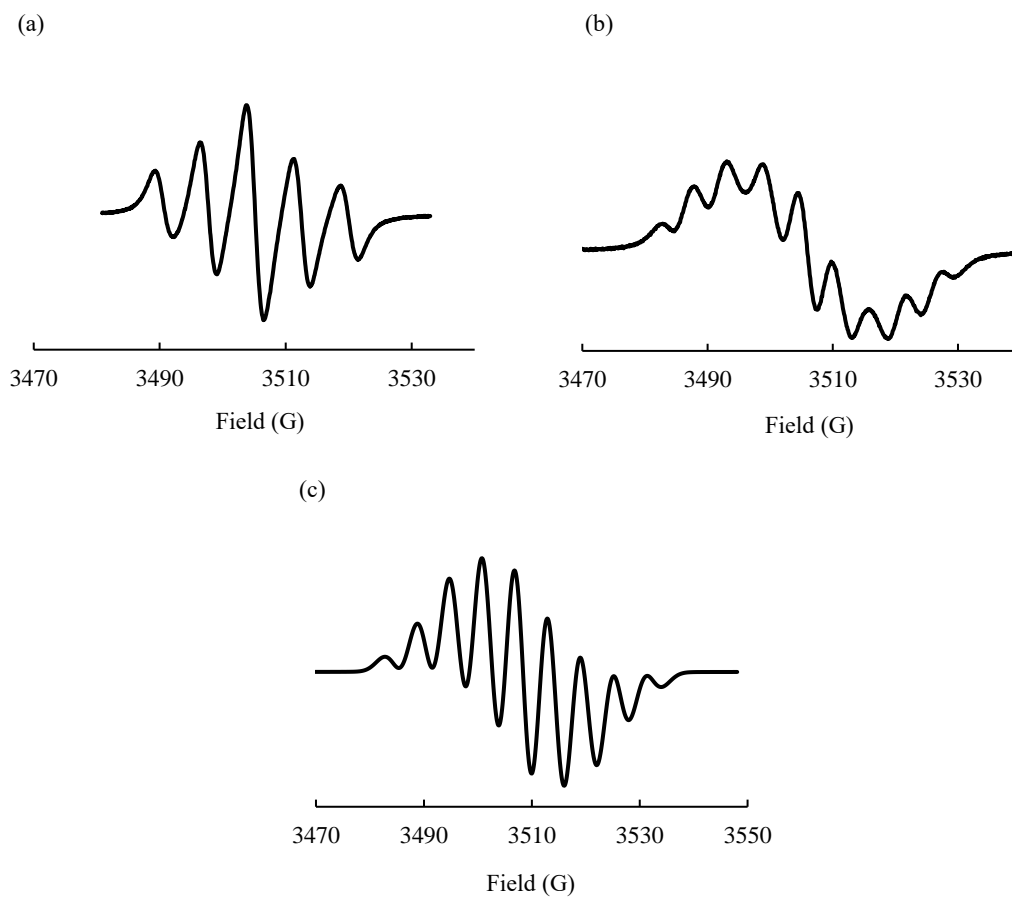

**Figure S5.** EPR spectra of **1**(a), **2**(b), and **3**(c) at r.t. in toluene.

## Crystallographic parameter

**Table S1.** Crystallographic parameters of **1**, **2** and **3**.

| Formula                       | C <sub>15</sub> H <sub>17</sub> N <sub>2</sub> O <sub>2</sub> ( <b>1</b> ) | C <sub>22</sub> H <sub>15</sub> N <sub>4</sub> O( <b>2</b> ) | C <sub>16</sub> H <sub>19</sub> N <sub>4</sub> O( <b>3</b> ) |
|-------------------------------|----------------------------------------------------------------------------|--------------------------------------------------------------|--------------------------------------------------------------|
| <i>M</i>                      | 257.30                                                                     | 351.38                                                       | 283.35                                                       |
| Crystal system                | monoclinic                                                                 | triclinic                                                    | monoclinic                                                   |
| Space group                   | <i>Cc</i>                                                                  | <i>P</i> -1                                                  | <i>P</i> 2 <sub>1</sub> / <i>n</i>                           |
| <i>a</i> , Å                  | 6.2033(7)                                                                  | 8.9743(7)                                                    | 16.302(3)                                                    |
| <i>b</i> , Å                  | 21.0864(19)                                                                | 10.2833(7)                                                   | 5.4709(11)                                                   |
| <i>c</i> , Å                  | 11.1658(11)                                                                | 10.9480(8)                                                   | 53.971(11)                                                   |
| <i>α</i> , deg                | 90                                                                         | 102.002(2)                                                   | 90                                                           |
| <i>β</i> , deg                | 106.122(4)                                                                 | 91.037(3)                                                    | 97.290(5)                                                    |
| <i>γ</i> , deg                | 90                                                                         | 113.571(2)                                                   | 90                                                           |
| <i>V</i> , Å <sup>3</sup>     | 1403.1(2)                                                                  | 900.00(11)                                                   | 4774.6(16)                                                   |
| <i>Z</i>                      | 4                                                                          | 2                                                            | 12                                                           |
| <i>D</i> , g cm <sup>-3</sup> | 1.218                                                                      | 1.297                                                        | 1.183                                                        |
| <i>R</i> (I > 2σ(I))          | 0.0423                                                                     | 0.0610                                                       | 0.0725                                                       |



### Distributions of SOMO and spin density

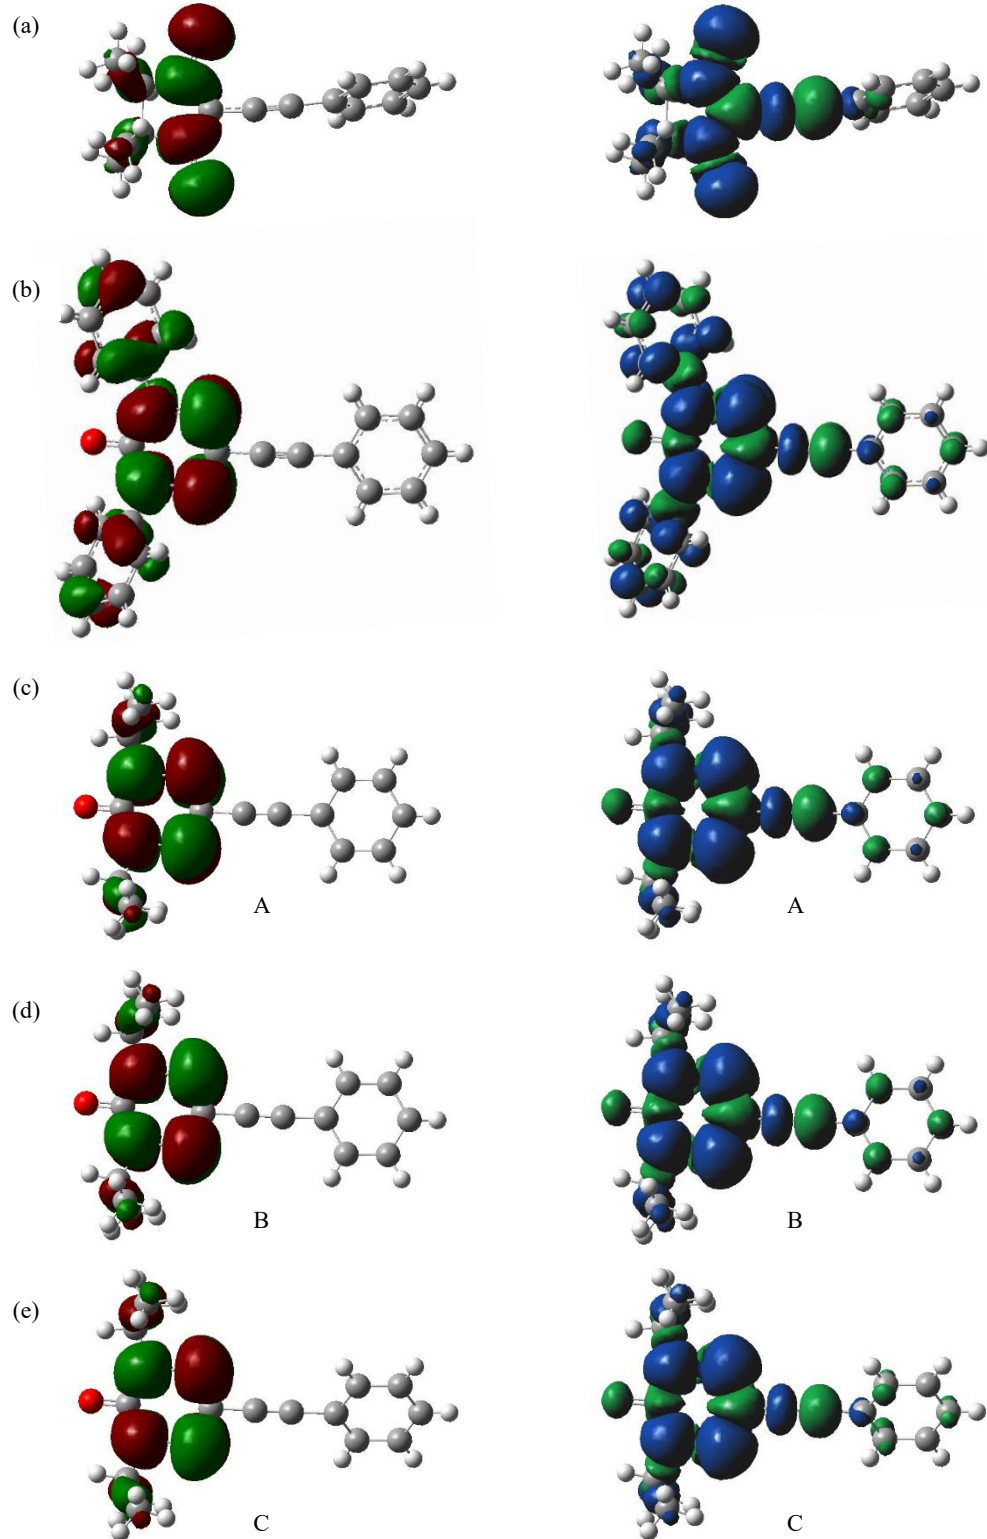

**Figure S6.** SOMO and spin density distributions of **1(a)**, **2(b)** and **3(c, d, e)**.

**Table S2.** The spin density distribution on the atom of **1**.

| atom | spin density | atom | Spin density |
|------|--------------|------|--------------|
| N1   | 0.259        | C9   | -0.153       |
| N2   | 0.264        | C10  | 0.015        |
| O1   | 0.357        | C11  | -0.010       |
| O2   | 0.363        | C12  | 0.003        |
| C1   | -0.220       | C13  | -0.006       |
| C2   | -0.015       | C14  | 0.003        |
| C3   | -0.015       | C15  | -0.010       |
| C8   | 0.091        |      |              |

**Table S3.** The spin density distribution on the atom of **2**.

| atom | spin density | atom | Spin density |
|------|--------------|------|--------------|
| N1   | 0.427        | C16  | -0.058       |
| N2   | 0.162        | C17  | 0.013        |
| N3   | 0.158        | C18  | -0.012       |
| N4   | 0.445        | C19  | 0.006        |
| O1   | -0.149       | C20  | -0.010       |
| C1   | -0.018       | C21  | 0.006        |
| C2   | -0.177       | C22  | -0.012       |
| C15  | 0.045        |      |              |

**Table S4.** The spin density distribution on the atom of **3(A)**.

| atom | spin density | atom | Spin density |
|------|--------------|------|--------------|
| N1   | 0.399        | C10  | -0.057       |
| N2   | 0.209        | C11  | 0.011        |
| N3   | 0.210        | C12  | -0.010       |
| N4   | 0.381        | C13  | 0.005        |
| O1   | -0.012       | C14  | -0.009       |
| C1   | -0.032       | C15  | 0.005        |
| C2   | -0.144       | C16  | -0.010       |
| C9   | 0.038        |      |              |

**Table S5.** The spin density distribution on the atom of **3(B)**.

| atom | spin density | atom | Spin density |
|------|--------------|------|--------------|
| N5   | 0.383        | C26  | -0.058       |
| N6   | 0.206        | C27  | 0.011        |
| N7   | 0.214        | C28  | -0.010       |
| N8   | 0.398        | C29  | 0.005        |
| O2   | -0.011       | C30  | -0.009       |
| C17  | -0.032       | C31  | 0.005        |
| C18  | -0.146       | C32  | -0.011       |
| C25  | 0.039        |      |              |

**Table S6.** The spin density distribution on the atom of **3(C)**.

| atom | spin density | atom | Spin density |
|------|--------------|------|--------------|
| N9   | 0.375        | C42  | -0.056       |
| N10  | 0.203        | C43  | 0.008        |
| N11  | 0.218        | C44  | -0.006       |
| N12  | 0.402        | C45  | 0.003        |
| O3   | -0.012       | C46  | -0.006       |
| C33  | -0.032       | C47  | 0.003        |
| C34  | -0.143       | C48  | -0.006       |
| C41  | 0.035        |      |              |
